# Supplementary material
Source: publisher figshare collection journal article supplement (https://acs.figshare.com/ndownloader/files/3922561)
Supplement: Supplementary file 1 [file 3922561]

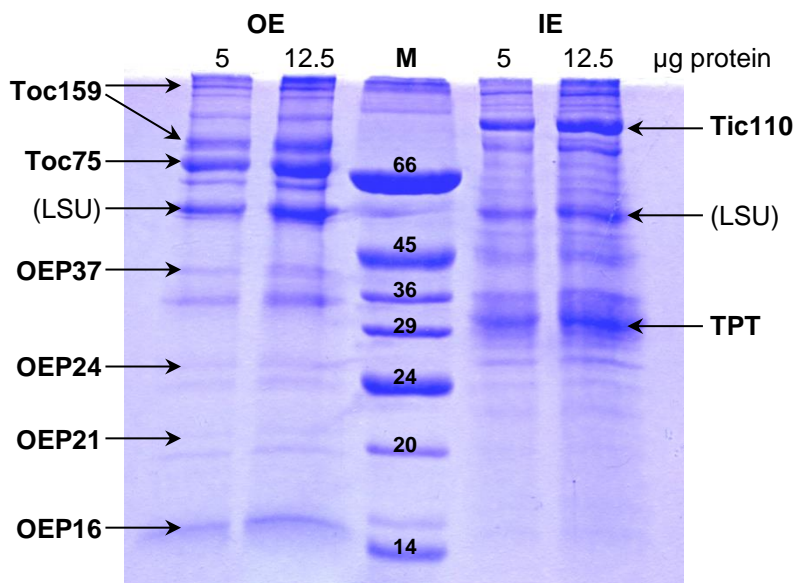

**Figure S1.** Representative one-dimensional SDS-PAGE gel of the IE and OE preparations used for proteomic analyses. Gels contained 5 or 12.5 μg of protein per lane and were stained with Coomassie blue. Membrane enrichment in the different fractions is illustrated by the content of specific, abundant and well-characterized proteins occurring in the IE and OE preparations, as described in the text. Please note that stromal contamination with the large subunit of Rubisco (LSU) occurs in both membranes, whereas cross-contamination with IE and OE specific proteins is low (compare immunoblots in Figure S2). Numbers in lane (M) indicate the molecular mass of marker proteins in kDa.
